# Supplementary material for: Comparison of serious inhaler technique errors made by device-naïve patients using three different dry powder inhalers: a randomised, crossover, open-label study
Source: Springer Nature journal article supplement (doi:10.1186/s12890-016-0169-5), 2016-01-14
Supplement: MOESM1 [file 9752046]

## Additional file 1

**Table S1** Primary endpoint: breakdown of Pulmojet errors – post-leaflet alone, and post-leaflet + video, nurse-observed serious errors, Pulmojet-Diskus comparison

| <b>Pulmojet serious errors</b>                                                                                                   | <b>Error type</b> | <b>Post-leaflet alone<br/>(n=277), n (%)</b> | <b>Post-leaflet + video<br/>(n=277), n (%)</b> |
|----------------------------------------------------------------------------------------------------------------------------------|-------------------|----------------------------------------------|------------------------------------------------|
| Does not remove cap*                                                                                                             | Preparation       | 6 (2.2)                                      | 1 (0.4)                                        |
| Green window (dose actuator) not checked                                                                                         | Preparation       | 60 (21.7)                                    | 9 (3.2)                                        |
| Places fingers or mouth completely over holes in the device body (restricting airflow)*                                          | Preparation       | 14 (5.1)                                     | 2 (0.7)                                        |
| Fails to put in mouth and seal lips around mouthpiece*                                                                           | Preparation       | 11 (4.0)                                     | 2 (0.7)                                        |
| Inhalation is not as fast as possible from the start (defined as audible 'soft plop' heard during the first half of inhalation)* | Inhalation        | 85 (30.7)                                    | 37 (13.4)                                      |
| Cap is not securely screwed down tightly onto base (with a snug fit) and an audible click is not heard*                          | Preparation       | 70 (25.3)                                    | 9 (3.2)                                        |
| Failure to inhale through mouthpiece*                                                                                            | Inhalation        | 10 (3.6)                                     | 4 (1.4)                                        |
| Inhalation through the nose at the same time as through the mouth                                                                | Inhalation        | 1 (0.4)                                      | 1 (0.4)                                        |
| Ask patient how they know when their device is empty - Does not know                                                             | General knowledge | 50 (18.1)                                    | 20 (7.2)                                       |

\*Errors included in the sensitivity analysis of definitely serious errors.

**Table S2** Primary endpoint: breakdown of Diskus errors - post-leaflet alone, and post-leaflet + video, nurse-observed serious errors, Pulmojet-Diskus comparison

| <b>Diskus serious errors</b>                                                                                                    | <b>Error type</b> | <b>Post-leaflet alone (n=277), n (%)</b> | <b>Post-leaflet + video (n=277), n (%)</b> |
|---------------------------------------------------------------------------------------------------------------------------------|-------------------|------------------------------------------|--------------------------------------------|
| Does not slide cover as far as possible*                                                                                        | Preparation       | 33 (11.9)                                | 12 (4.3)                                   |
| Does not slide lever fully to open mouthpiece*                                                                                  | Preparation       | 63 (22.7)                                | 23 (8.3)                                   |
| Holds in a downward position after dose preparation (before an inhalation)                                                      | Positioning       | 73 (26.4)                                | 41 (14.8)                                  |
| Shakes after dose preparation*                                                                                                  | Preparation       | 2 (0.7)                                  | 2 (0.7)                                    |
| Blowing into the device before inhalation*                                                                                      | Preparation       | 21 (7.6)                                 | 6 (2.2)                                    |
| Fails to put in mouth and seal lips around mouthpiece*                                                                          | Preparation       | 17 (6.1)                                 | 10 (3.6)                                   |
| Inhalation is not as fast as possible from the start (defined as a very fast suck) / Inhalation is not forceful from the start* | Inhalation        | 115 (41.5)                               | 60 (21.7)                                  |
| Failure to inhale through mouthpiece*                                                                                           | Inhalation        | 34 (12.3)                                | 12 (4.3)                                   |
| Inhalation through the nose at the same time as through the mouth                                                               | Inhalation        | 0 (0)                                    | 0 (0)                                      |
| Ask patient how they know when their device is empty - Does not know.                                                           | General Knowledge | 70 (25.3)                                | 10 (3.6)                                   |

\*Errors included in the sensitivity analysis of definitely serious errors.

**Table S3** Primary endpoint: breakdown of Pulmojet errors - post-leaflet alone, and post-leaflet + video, nurse-observed serious errors, Pulmojet-Turbohaler comparison

| <b>Pulmojet serious errors</b>                                                                                                   | <b>Error type</b> | <b>Post-leaflet alone (n=144), n (%)</b> | <b>Post-leaflet + video (n=144), n (%)</b> |
|----------------------------------------------------------------------------------------------------------------------------------|-------------------|------------------------------------------|--------------------------------------------|
| Does not remove cap*                                                                                                             | Preparation       | 4 (2.8)                                  | 0 (0)                                      |
| Green window (dose actuator) not checked                                                                                         | Preparation       | 51 (35.4)                                | 11 (7.6)                                   |
| Places fingers or mouth completely over holes in the device body (restricting airflow)*                                          | Preparation       | 9 (6.3)                                  | 3 (2.1)                                    |
| Fails to put in mouth and seal lips around mouthpiece*                                                                           | Preparation       | 6 (4.2)                                  | 1 (0.7)                                    |
| Inhalation is not as fast as possible from the start (defined as audible 'soft plop' heard during the first half of inhalation)* | Inhalation        | 44 (30.6)                                | 21 (14.6)                                  |
| Cap is not securely screwed down tightly onto base (with a snug fit) and an audible click is not heard*                          | Preparation       | 30 (20.8)                                | 6 (4.2)                                    |
| Failure to inhale through mouthpiece*                                                                                            | Inhalation        | 7 (4.9)                                  | 3 (2.1)                                    |
| Inhalation through the nose at the same time as through the mouth                                                                | Inhalation        | 2 (1.4)                                  | 2 (1.4)                                    |
| Ask patient how they know when their device is empty - Does not know                                                             | General knowledge | 19 (13.2)                                | 5 (3.5)                                    |

\*Errors included in the sensitivity analysis of definitely serious errors.

**Table S4** Primary endpoint: breakdown of Turbohaler errors - post-leaflet alone, and post-leaflet + video, nurse-observed serious errors, Pulmojet-Turbohaler comparison

| <b>Turbohaler serious errors</b>                                                                                                | <b>Error type</b> | <b>Post-leaflet alone (n=144), n (%)</b> | <b>Post-leaflet + video (n=144), n (%)</b> |
|---------------------------------------------------------------------------------------------------------------------------------|-------------------|------------------------------------------|--------------------------------------------|
| Does not remove cap*                                                                                                            | Preparation       | 1 (0.7)                                  | 0 (0)                                      |
| Places fingers or mouth completely over holes in the device body (restricting airflow)                                          | Preparation       | 24 (16.7)                                | 9 (6.3)                                    |
| Fails to put in mouth and seal lips around mouthpiece*                                                                          | Preparation       | 5 (3.5)                                  | 0 (0)                                      |
| Shakes during preparation*†                                                                                                     | Preparation       | 2 (1.4)                                  | 0 (0)                                      |
| Device not held upright (mouthpiece skywards) when the base is twisted during dose preparation*‡                                | Preparation       | 55 (38.2)                                | 31 (21.5)                                  |
| Dose not prepared correctly- twisting the base until it clicks*                                                                 | Preparation       | 31 (21.5)                                | 14 (9.7)                                   |
| Dose not prepared correctly- turn it back to the original position*                                                             | Preparation       | 50 (34.7)                                | 21 (14.6)                                  |
| Device not held upright (mouthpiece skywards) after the base is twisted until inhalation*‡                                      | Positioning       | 54 (37.5)                                | 22 (15.3)                                  |
| Shakes after dose preparation*                                                                                                  | Preparation       | 1 (0.7)                                  | 0 (0)                                      |
| Exhales into the inhaler before taking dose*                                                                                    | Inhalation        | 0 (0)                                    | 0 (0)                                      |
| Inhalation is not as fast as possible from the start (defined as a very fast suck) / Inhalation is not forceful from the start* | Inhalation        | 55 (38.2)                                | 30 (20.8)                                  |
| Failure to inhale through mouthpiece*                                                                                           | Inhalation        | 6 (4.2)                                  | 3 (2.1)                                    |
| Inhalation through the nose at the same time as through the mouth                                                               | Inhalation        | 2 (1.4)                                  | 1 (0.7)                                    |
| Cap is not securely screwed down tightly onto base                                                                              | Preparation       | 7 (4.9)                                  | 2 (1.4)                                    |
| Ask patient how they know when their device is empty - Does not know                                                            | General knowledge | 35 (24.3)                                | 6 (4.2)                                    |

\*Errors included in the sensitivity analysis of definitely serious errors.

†Error based on in vitro data (unpublished).

‡Up to a 45-degree angle was allowed for inhaler positioning.
