# Supplementary material for: Comparison of serious inhaler technique errors made by device-naïve patients using three different dry powder inhalers: a randomised, crossover, open-label study
Source: Springer Nature journal article supplement (doi:10.1186/s12890-016-0169-5), 2016-01-14
Supplement: MOESM3 [file 9752046]

### Additional file 3

**Table S5** Local Principal Investigators responsible for the conduct of the study at general practice sites participating in the study.

| <b>Study Site</b>                                          | <b>Principal Investigator</b> |
|------------------------------------------------------------|-------------------------------|
| Station House Surgery                                      | Dr Sarah Woodford             |
| Westcliffe Medical Practice                                | Dr. Sara Humphrey             |
| Thornton-Denholme Medical Centre                           | Dr Ruth Stockwell             |
| Kilmeny Group Medical Practice                             | Dr. Jim Hodgson               |
| ShIPLEY Medical Practice                                   | Dr Kirsty Hogg                |
| North Leeds Medical Practice                               | Dr. Katherine Hickman         |
| Dr Kilpatrick & Partners - Two Shires                      | Dr Shora D Montgomerie        |
| Castle Mead Medical Centre                                 | Dr. David Tull                |
| North Brink Surgery                                        | Dr. Mandeep Sira              |
| Parson Drove Surgery                                       | Dr. Ashish Rastogi            |
| Wellside Surgery                                           | Dr. Basia Uszycka             |
| Yaxley Group Practice                                      | Dr Bhatia Jaspreet            |
| Buckden and Little Paxton Surgery                          | Dr. Kevin Brinkhurst          |
| Papworth Surgery                                           | Dr. Silyee Tan                |
| Grove Surgery,                                             | Dr Duncan Edwards             |
| Gurney Surgery, Mile End Road Surgery<br>Tuckswood Surgery | Dr Joanne Walsh               |
| Magdalen Medical Practice                                  | Dr Helen Sharp                |
| Mundesley Medical Centre                                   | Dr Daryl Freeman              |
| Mount Farm Surgery                                         | Dr Brian Ainsworth            |
| Chesterfield Drive Surgery                                 | Dr. Balaji Donepudi           |
| Stowhealth                                                 | Dr. Neil Macey                |
| The Peninsula Practice                                     | Dr Lindsey Crocket            |
| Framfield House Surgery                                    | Dr. Phil Weeks                |
| Wickham Market Medical Centre                              | Dr. Will Elson                |

|                                                                                   |                         |
|-----------------------------------------------------------------------------------|-------------------------|
| S J Morris & Partners                                                             | Dr. Yvonne Webb         |
| Lea Vale Medical Group                                                            | Dr. Paul A Singer       |
| Dr M L & Dr P Agrawal                                                             | Dr. M Agrawal           |
| Neville Road Surgery                                                              | Dr. Sajid Mehmood       |
| Whitstable Medical Centre/Chestfield Medical Centre / Estuary View Medical Centre | Dr. Hilary Pinnock      |
| Adcroft Surgery                                                                   | Dr Stephen Locke        |
| Hawthorn Medical Centre                                                           | Dr Simon Dowdeswell     |
| Bradford Road Medical Centre                                                      | Dr Tobias Cookson       |
| Yeo Vale Medical Practice                                                         | Dr. Matthew Hoghton     |
| Oak Tree Surgery                                                                  | Dr Rehan Symonds        |
| Old Bridge Surgery                                                                | Dr Pascual Daza-Ramirez |
| The Stennack Surgery                                                              | Dr. Sarah Shaw          |
| Brunel Medical Practice                                                           | Dr Richard Veale        |
| Coleridge Medical Centre                                                          | Dr Lisa Gibbons         |
| Peterhead Medical Practice                                                        | Dr. Iain Small          |
